# Supplementary material for: Long-Term Expansion, Enhanced Chondrogenic Potential, and Suppression of Endochondral Ossification of Adult Human MSCs via WNT Signaling Modulation
Source: PubMed Central journal article supplement — Stem Cell Reports. 2015 Feb 26;4(3):459–72. doi: 10.1016/j.stemcr.2015.01.017 (PMC4375944; doi:10.1016/j.stemcr.2015.01.017), 2015-02-26
Supplement: mmc1.pdf [file mmc1.pdf]

Stem Cell Reports, Volume 4

Supplemental Information

**Long-Term Expansion, Enhanced Chondrogenic Potential,  
and Suppression of Endochondral Ossification  
of Adult Human MSCs via WNT Signaling Modulation**

Roberto Narcisi, Mairéad A. Cleary, Pieter A.J. Brama, Martin J. Hoogduijn, Nesrin  
Tüysüz, Derk ten Berge, and Gerjo J.V.M. van Osch

## Supplemental figures and legends

Figure S1

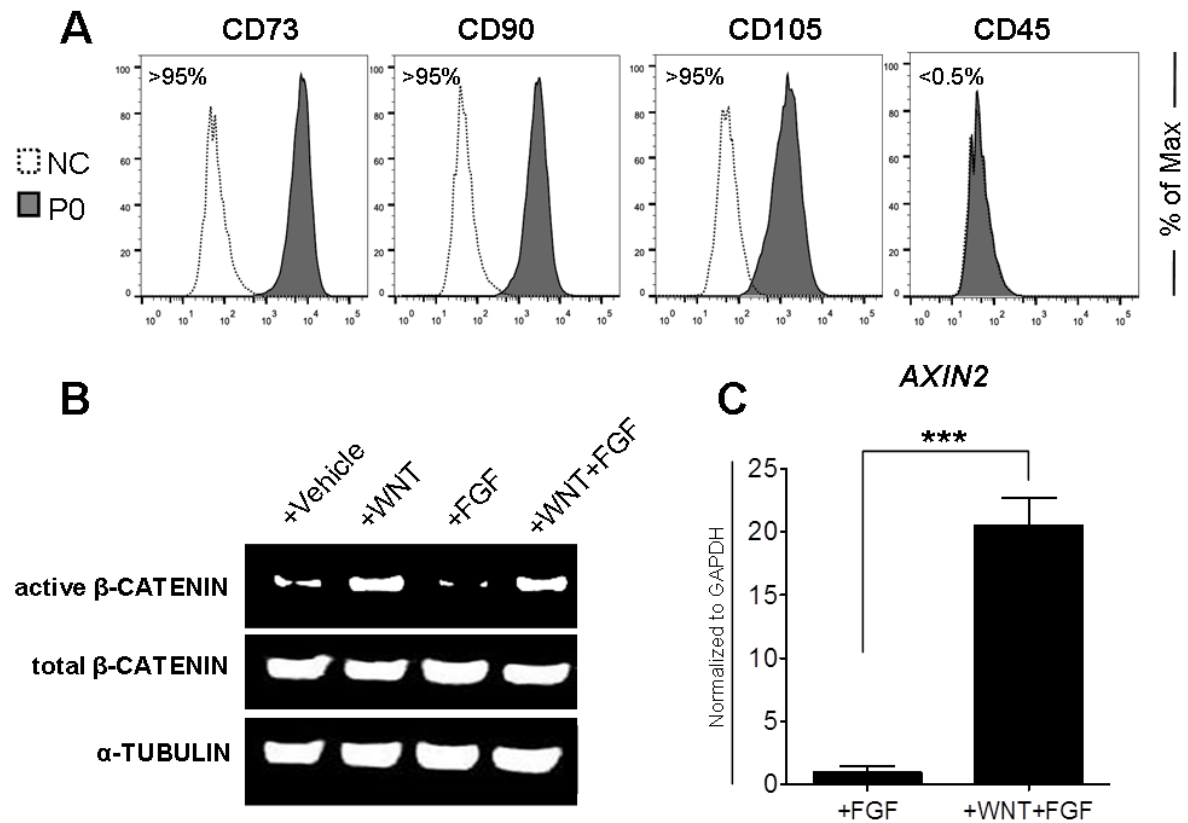

**Figure S1, related to Figure 1.** WNT3A induces WNT signalling activation of human MSCs. (A) MSCs were characterized for their surface marker expression by flow cytometry. Numbers indicate the percentage of positive cells for the indicated markers. NC = negative control, P0 = after selection by plastic adherence. (B) After expansion for one passage in the indicated media, active (non-phosphorylated) and total (phosphorylated)  $\beta$ -CATENIN accumulation in the MSCs was detected by western blot. (C) Transcript analysis of WNT target gene *AXIN2* on MSCs expanded in the indicated conditions. Values represents means  $\pm$  s.e.m. of 3 MSC donors (n=3) in biological triplicate. \*\*\*P<0.001.

Figure S2

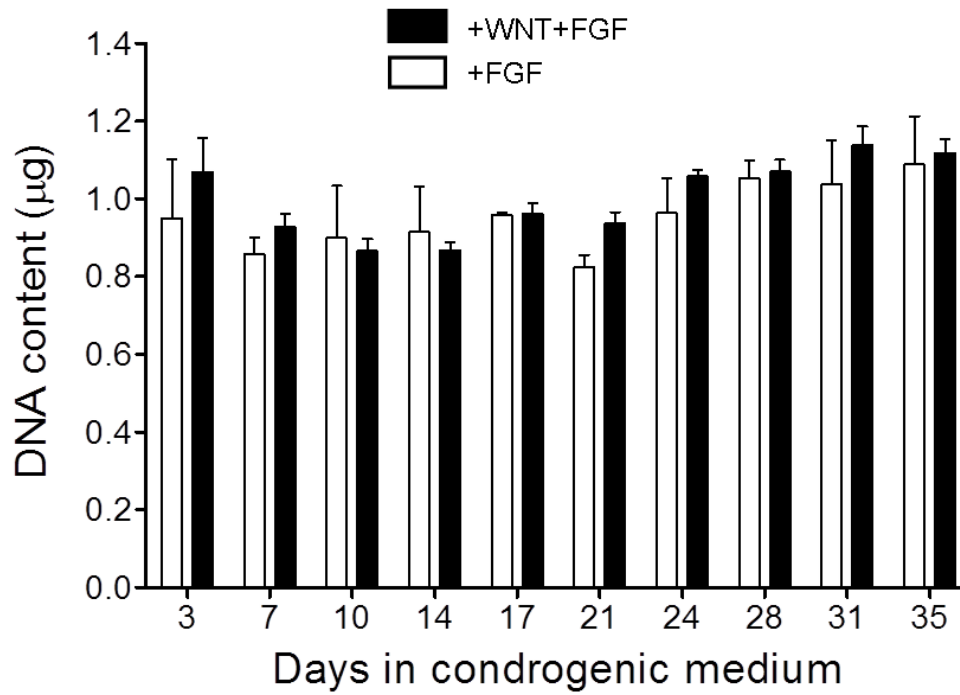

**Figure S2, related to Figure 2.** Pellets formed from MSCs expanded in the indicated conditions contain comparable amounts of DNA over time. Values represent means  $\pm$  s.d. of 3 to 4 pellets from the same MSC donor.

Figure S3

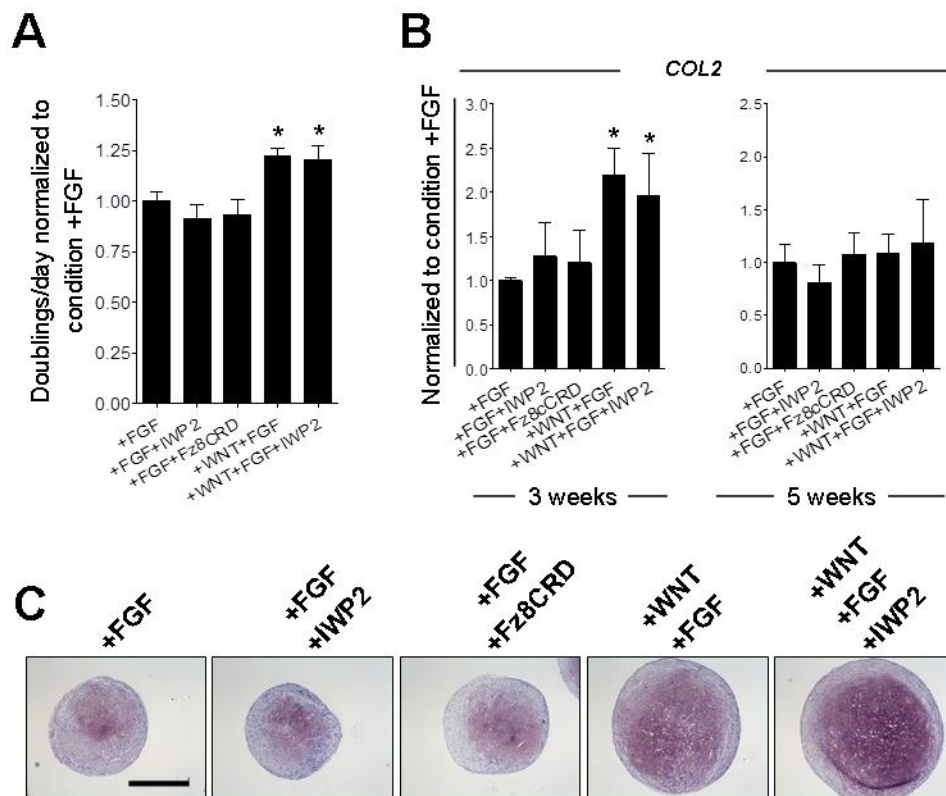

**Figure S3, related to figure 3.** Endogenous WNT does not influence expansion and chondrogenic potential of MSCs. (A) Proliferation rate of MSCs during expansion in the indicated media (n=4 donors). (B) Relative gene expression levels of *COL2* in pellet cultures from cells expanded in the indicated conditions, after 3 or 5 weeks of chondrogenic induction (n=3 donors with 3 pellets per donor). (C) Thionine staining (glycosaminoglycan) of representative sections from cartilage pellets formed with cells expanded in the indicated conditions, after 5 weeks of chondrogenic induction (n=3 donors with 2 to 3 pellets per donor). Values represent means  $\pm$  s.e.m. \* $P < 0.05$  compared to the conditions with FGF  $\pm$  IWP2 or Fz8CRD. Scale bar, 1 mm. IWP2 = Wnt secretion inhibitor (blocker of acyltransferase enzyme porcupine), Fz8CRD = soluble WNT receptor.

Figure S4

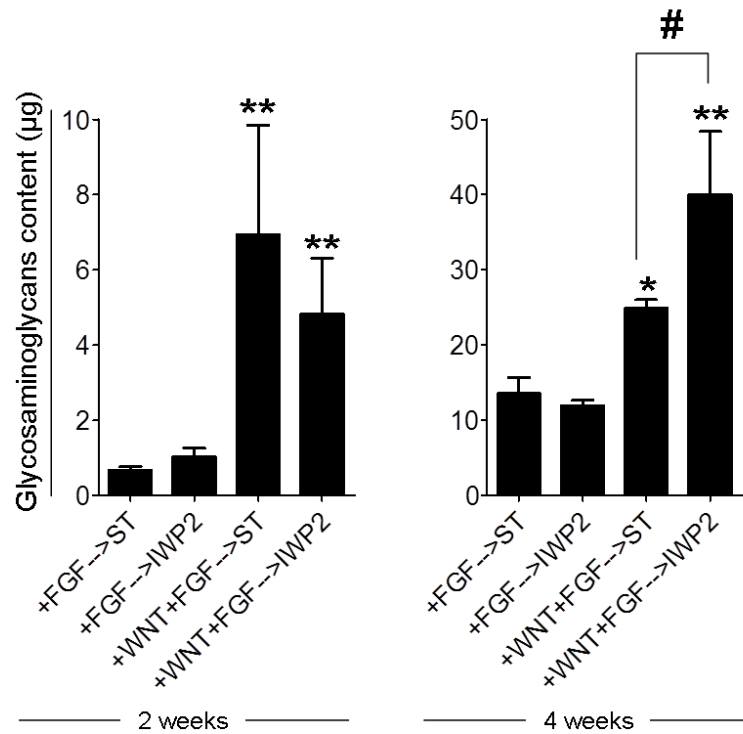

**Figure S4, related to Figure 4.** Treatment with IWP2 enhances and accelerates glycosaminoglycan production of pellet formed by WF-MSCs. Glycosaminoglycan content in pellet cultures after 2 or 4 weeks in standard ( $\rightarrow$ ST) or IWP2-supplemented ( $\rightarrow$ IWP2) chondrogenic medium. Values represent means  $\pm$  s.e.m of 3 MSC donors with 2 to 3 pellets per donor. # $P < 0.05$ . \* $P < 0.05$  and \*\* $P < 0.01$  compared to both +FGF $\rightarrow$ ST and +FGF $\rightarrow$ IWP2.

Figure S5

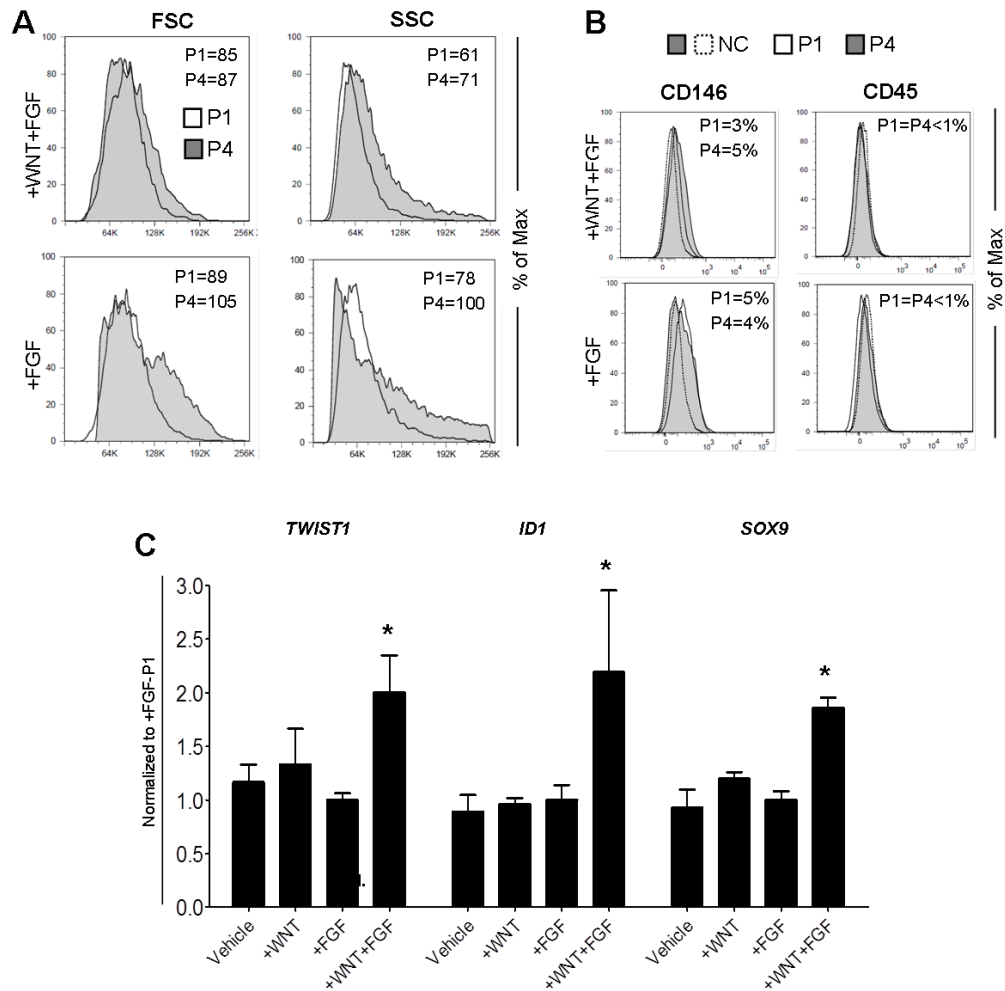

**Figure S5, related to Figure 5.** MSCs expanded with WNT3A and FGF2 display a unique phenotype. (A) Size distribution analysis (FCS=forward scatter) and cell granularity analysis of (SSC=side scatter) of MSCs expanded as indicated. Values represent the mean obtained from 2 independent donors. NC = negative control, P1 = passage 1, P4 = passage 4. (B) Flow cytometry analysis of markers not affected by the different expansion conditions. Values represent the mean obtained from 3 independent donors. (C) Transcript analysis on P1-expanded MSCs in the indicated conditions. Values represent means  $\pm$  s.e.m. of 3 MSCs donors, 2 pellets per donor. \* $P < 0.05$  compared to the other conditions.

## Supplemental Experimental Procedures

**Western blot.** After P1-expansion, and 3 h after last medium renew, MSC of two donors were harvested using M-PER Protein extraction reagent (Thermo Scientific, Rockford, IL, USA) with 1% protease inhibitor (Roche, Mannheim, Germany). Equal amounts of protein lysate were subjected to 10% SDS-PAGE gels and transferred on PVDF membranes. Membranes were blocked (0.1% tris/tween buffer containing 5% dry milk powder) and then incubated overnight at 4°C with primary antibody (**Table S2**). Afterwards, anti-rabbit secondary antibody was added for 1 h at room temperature. Antibodies were purchased from Cell Signaling Technology (Leiden, the Netherlands). The blots were visualized with SuperSignal West Pico Chemiluminescent Substrate (Thermo Scientific, Rockford, IL, USA) following manufacturer's instructions.

**Osteogenic differentiation.** Cells were seeded at 3,000 cells cm<sup>-2</sup> and cultured for 18 days with DMEM-high glucose (Gibco) + 10% FCS, 50 µg ml<sup>-1</sup> gentamicin, 1.5 µg ml<sup>-1</sup> fungizone, β-glycerophosphate 10 mM, dexamethasone 0.1 µM and L-ascorbic acid 2 phosphate 0.5 mM (all from Sigma-Aldrich). Cultures were fixed in 10% formalin, hydrated with water and treated with 5% silver nitrate solution (Sigma-Aldrich) for 10 minutes. Excess staining was removed with 5% sodium-thiosulphate (Sigma-Aldrich) followed by counterstaining with azophloxine (Sigma-Aldrich).

**Adipogenic differentiation.** Cells were seeded at 20,000 cells cm<sup>-2</sup> and cultured for 3 weeks in DMEM-high glucose (Gibco) + 10% FCS, supplemented with 50 µg ml<sup>-1</sup> gentamicin, 1.5 µg ml<sup>-1</sup> fungizone, dexamethasone 1 µM, indo-methacin 0.2 mM, insulin 0.01 mg ml<sup>-1</sup>, and 3-isobutyl-1-methyl-xanthine 0.5 mM (all from Sigma-Aldrich). Cultures were fixed in 10%

formalin, treated with 0.3% Oil red O solution (Sigma-Aldrich) for 15 min, and then washed with tap water.

## Supplemental tables

**Table S1 - SYBR/Taqman primer and probe sequences**

| Gene name     | Description                        | Primers                                                       |  | Probe                                                         |
|---------------|------------------------------------|---------------------------------------------------------------|--|---------------------------------------------------------------|
|               |                                    | Forward (Fw) and Reverse (Rv)                                 |  |                                                               |
| <i>COL2</i>   | Chondrogenic marker                | Fw: GGCAATAGCAGGTTACGTACA<br>Rv: CGATAACAGTCTTGCCCCACTT       |  | CCGGTATGTTTCGTGCAGCCATCCT                                     |
| <i>COL2B</i>  | Chondrogenic marker                | Fw: GCTGTCCTTCGGTGTC<br>Rv: GTTCTCCTTTCTGTCCCTTTGGT           |  | CTGGTTGCCGGACATC                                              |
| <i>SOX9</i>   | Chondrogenic marker                | Fw: TCCACGAAGGGCCGC<br>Rv: CAACGCCGAGCTCAGCA                  |  | TGGGCAAGCTCTGGAGACTTCTGAA<br>CG                               |
| <i>MMP13</i>  | Hypertrophic marker                | Fw: AAGGAGCATGGCGACTTCT<br>Rv: TGGCCAGGAGGAAAAGC              |  | CCCTCTGGCCTGCGGCTCA                                           |
| <i>COL10</i>  | Hypertrophic marker                | Fw: CAAGGCACCATCTCCAGGAA<br>Rv: AAAGGGTATTTGTGGCAGCATATT      |  | TCCAGCACGCAGAATCCATCTGA                                       |
| <i>ALP</i>    | Hypertrophic/<br>osteogenic marker | Fw: GACCCTCACCCCCACAAT<br>Rv: GCTCGTACTGCATGTCCCT             |  | TGGACTACCTATTGGGTCTCTTCGAG<br>CCA                             |
| <i>FABP4</i>  | Adipogenic marker                  | Fw: TGTCTCCAGTGAAAACCTTTGATGATTA<br>Rv: CCATGCCAGCCACTTTCC    |  | N.A.                                                          |
| <i>AXIN2</i>  | $\beta$ -CATENIN target gene       | Purchased by AB applied Biosistem (Axin2 FAM, Hs00610344_m1)  |  | Purchased by AB applied Biosistem (Axin2 FAM, Hs00610344_m1)  |
| <i>TWIST1</i> | Uncommitted marker                 | Purchased by AB applied Biosistem (Twist1 FAM, Hs01675818_s1) |  | Purchased by AB applied Biosistem (Twist1 FAM, Hs01675818_s1) |
| <i>ID1</i>    | <i>TWIST1</i> target gene          | Purchased by AB applied Biosistem (ID1 FAM, Hs03676575_s1)    |  | Purchased by AB applied Biosistem (ID1 FAM, Hs03676575_s1)    |
| <i>MYC</i>    | Proliferative marker               | Fw: GGTCCTGGCAAAGGTC<br>Rv: CTGCGTAGTTGTGCTGATGT              |  | N.A.                                                          |
| <i>MYCL1</i>  | Proliferative marker               | Fw: CTGCGGGGAGGATTTCTACC<br>Rv: CATGCAGTCACGGCGTATGAT         |  | N.A.                                                          |
| <i>NMYC</i>   | Proliferative marker               | Fw: ACCCGGACGAAGATGACTTCT<br>Rv: CAGCTCGTTCTCAAGCAGCAT        |  | N.A.                                                          |
| <i>GAPDH</i>  | Refer gene                         | Fw: ATGGGGAAGGTGAAGGTCG<br>Rv: TAAAAGCAGCCCTGGTGACC           |  | CGCCCAATACGACCAATCCGTTGAC                                     |

N.A. = not applicable. This is valid for the SYBR green-based primers



**Table S2 - Western Blot antibodies**

| <b>Antibody name</b>     | <b>Type</b> | <b>Cat#</b> |
|--------------------------|-------------|-------------|
| Active- $\beta$ -CATENIN | Primary     | 8814        |
| Total- $\beta$ -CATENIN  | Primary     | 9587        |
| $\alpha$ -TUBULIN        | Primary     | 2125        |
| Anti -rabbit/HRP-linked  | Secondary   | 7074        |

All antibodies used for western Blot were purchased from Cell Signalling
